# Supplementary material
Source: PubMed Central journal article supplement (PMC5386999)
Supplement: BPH-174-893-s003.pdf [file BPH-174-893-s003.pdf]

Supplemental data

**Table S1 The sequences of PFKFB3 siRNA oligonucleotides**

|                | sequences           |
|----------------|---------------------|
| PFKFB3 siRNA-1 | GAAGAGGATCAGTTGCTAT |
| PFKFB3 siRNA-2 | CCGTCATGAGACGCAATA  |
| PFKFB3 siRNA-3 | GTCGCTGATCAAGGTGATT |
